# Supplementary material
Source: publisher site journal article supplement (https://www.dovepress.com/article/404047)

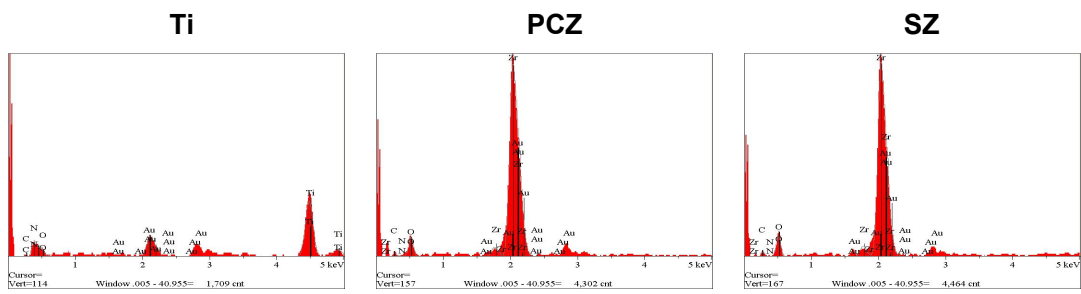

**Supplementary figure 1: The EDS energy spectrum of Ti, PCZ, and SZ samples.**

Supplement: Supplementary file 1 [file get_supplementary_file.php]
